# Supplementary material
Source: publisher figshare collection journal article supplement (https://acs.figshare.com/ndownloader/files/8351087)
Supplement: Supplementary file 1 [file 8351087]

**Identification of emerging brominated chemicals as the transformation products of tetrabromobisphenol A (TBBPA) derivatives in soil**

Aifeng Liu<sup>1</sup>, Jianbo Shi<sup>1,2,3</sup> \*, Guangbo Qu<sup>1,3</sup> \*, Ligang Hu<sup>1,3</sup>, Qianchi Ma<sup>1,3</sup>, Maoyong Song<sup>1,3</sup>, Chuanyong Jing<sup>1,3</sup>, Guibin Jiang<sup>1,3</sup>

<sup>1</sup> State Key Laboratory of Environmental Chemistry and Ecotoxicology, Research Center for Eco-Environmental Sciences, Chinese Academy of Sciences, P.O. Box 2871, Beijing 100085, China

<sup>2</sup> Institute of Environment and Health, Jiangnan University, Wuhan 430056, China

<sup>3</sup> College of Resources and Environment, University of Chinese Academy of Sciences, Beijing 100049, China

\* Corresponding author

Tel/fax: +86-10-62849129

E-mail: [jbsbi@rcees.ac.cn](mailto:jbsbi@rcees.ac.cn) (Jianbo Shi)

[gbqu@rcees.ac.cn](mailto:gbqu@rcees.ac.cn) (Guangbo Qu)

---

**This Supporting Information contains 11 figures and 7 tables.**

|                                                                                  |     |
|----------------------------------------------------------------------------------|-----|
| Instrumental Parameters of UHPLC-Orbitrap HRMS                                   | S3  |
| Elution Program Employed in HPLC-UV Analysis                                     | S3  |
| Structure Identification through the MS <sup>2</sup> Spectra of Figure S4 and S5 | S9  |
| Synthesis Procedure and <sup>1</sup> HNMR Data                                   | S14 |
| Figure S1                                                                        | S4  |
| Figure S2                                                                        | S5  |
| Figure S3                                                                        | S6  |
| Figure S4                                                                        | S7  |
| Figure S5                                                                        | S8  |
| Figure S6                                                                        | S10 |
| Figure S7                                                                        | S11 |
| Figure S8                                                                        | S12 |
| Figure S9                                                                        | S13 |
| Figure S10                                                                       | S16 |
| Figure S11                                                                       | S17 |
| Table S1                                                                         | S18 |
| Table S2                                                                         | S21 |
| Table S3                                                                         | S22 |
| Table S4                                                                         | S23 |
| Table S5                                                                         | S25 |
| Table S6                                                                         | S26 |
| Table S7                                                                         | S28 |
| References                                                                       | S29 |

---

### ***Instrumental Parameters of UHPLC-Orbitrap HRMS***

Methanol (A) and water (B) were applied as mobile phases at a flow rate of 0.6 mL/min. The mobile phase gradient was initially 80:20 (v/v, A/B) and kept for 2 min, then increased to 100% A along 10 min and returned to 80:20 (v/v, A/B) in 1 min and then kept for 2 additional min. The recommended values were used in the full scan acquisition under heated electrospray ionization (HESI) mode without further optimization. The parameters used for the mass spectrometer were the following: full scan range (m/z), 100 to 1000; spray voltage, 2500 V; sweep gas flow rate, 1 respective arbitrary units; sheath gas flow rate, 40 respective arbitrary units; aux gas flow rate, 10 respective arbitrary units; ion transfer tube temperature, 350 °C; vaporizer temperature, 200 °C; MS<sup>1</sup> detector, Orbitrap; MS<sup>1</sup> resolution, 120,000; MS<sup>1</sup> scan range, 100-1000; MS<sup>1</sup> maximum injection time, 100 ms; MS<sup>1</sup> automated gain control (AGC) target, 100,000; S-lens RF level, 60 V; MS<sup>2</sup> higher-energy collisional dissociation (HCD) collision energy, 45%; MS<sup>2</sup> detector, Orbitrap; MS<sup>2</sup> isolation, 16; MS<sup>2</sup> resolution, 15,000; MS<sup>2</sup> AGC target, 50,000; MS<sup>2</sup> maximum injection time, 35 ms; MS<sup>2</sup> start mass, 50. Xcalibur Qual and Quan Browser software were used for the qualitative and quantitative calculation.

***Elution Program Employed in HPLC-UV Analysis*** Thermo Ultimate 3000 HPLC coupled with a UV detector were used for the instrumental analysis. And ZORBAX ODS (150 × 3.0 mm, 5 µm, Agilent) column was used for the purity analysis and degradation products analysis. Methanol (A) and water (B) were applied as the mobile phases at a flow rate of 0.35 mL/min. The flow gradient was 80:20 (v/v, A/B) initially, and kept for 2 min, then increased to 100% A in 9 min and held for 2 min. The gradient was then returned to 80:20 (v/v, A/B) in 1 min and kept for 2 min. The wavelength of UV detector was set at 214 nm.

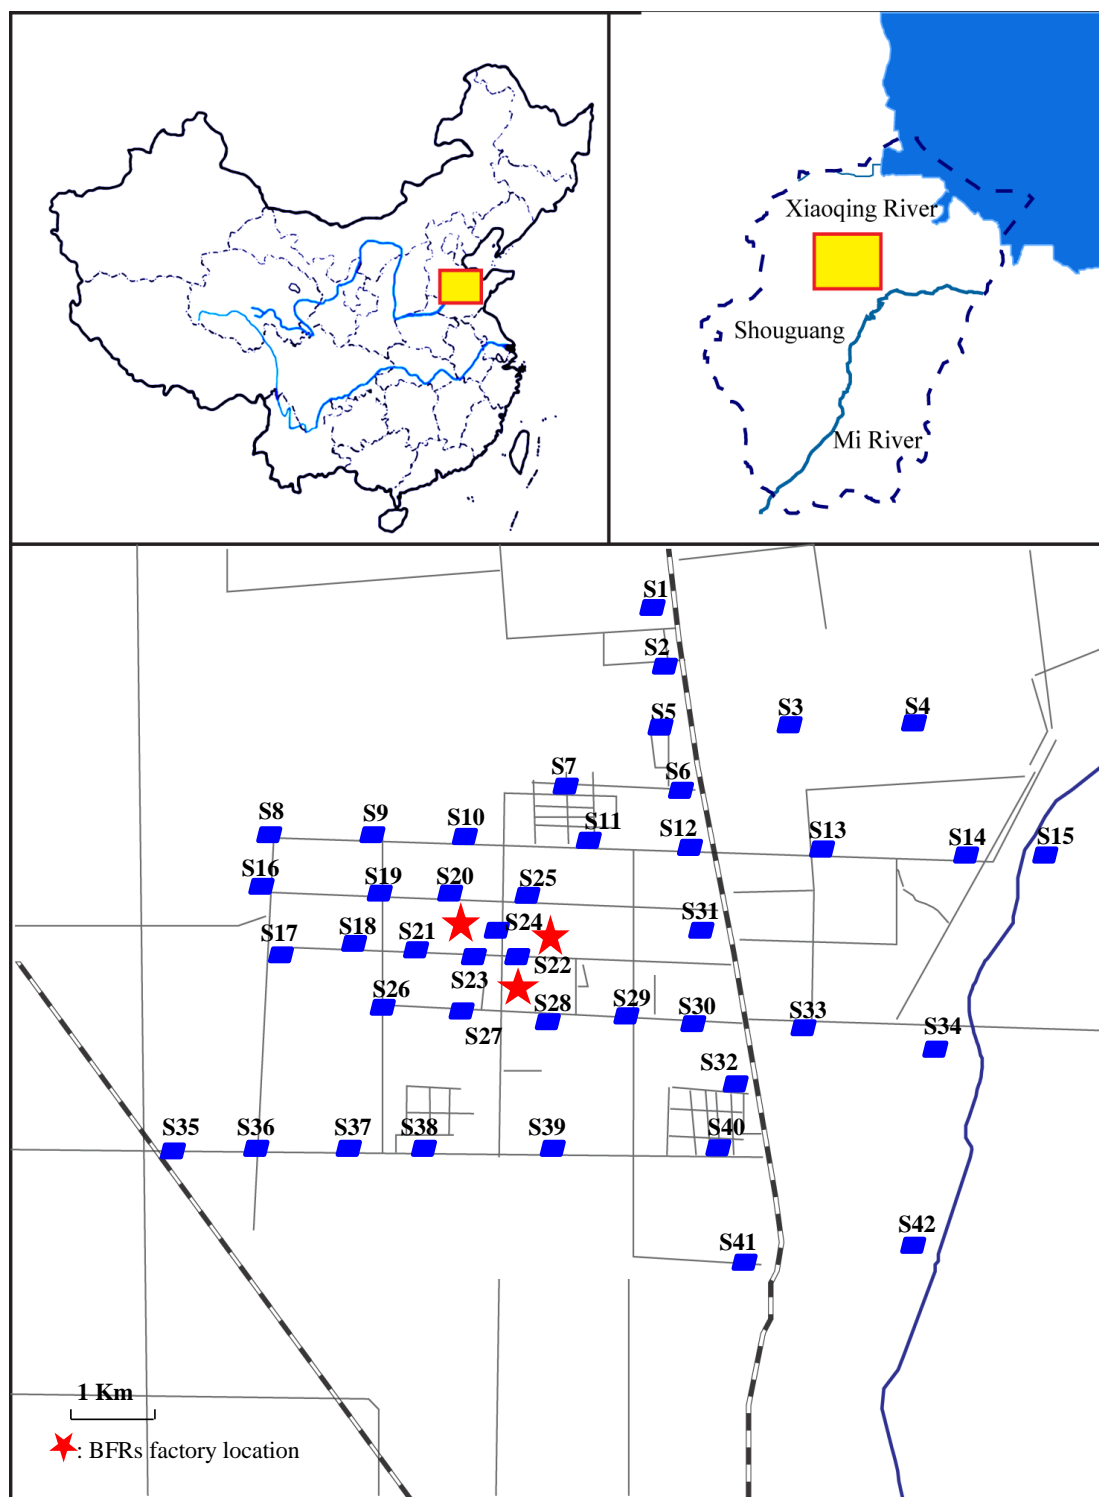

**Figure S1. Sampling sites map.**

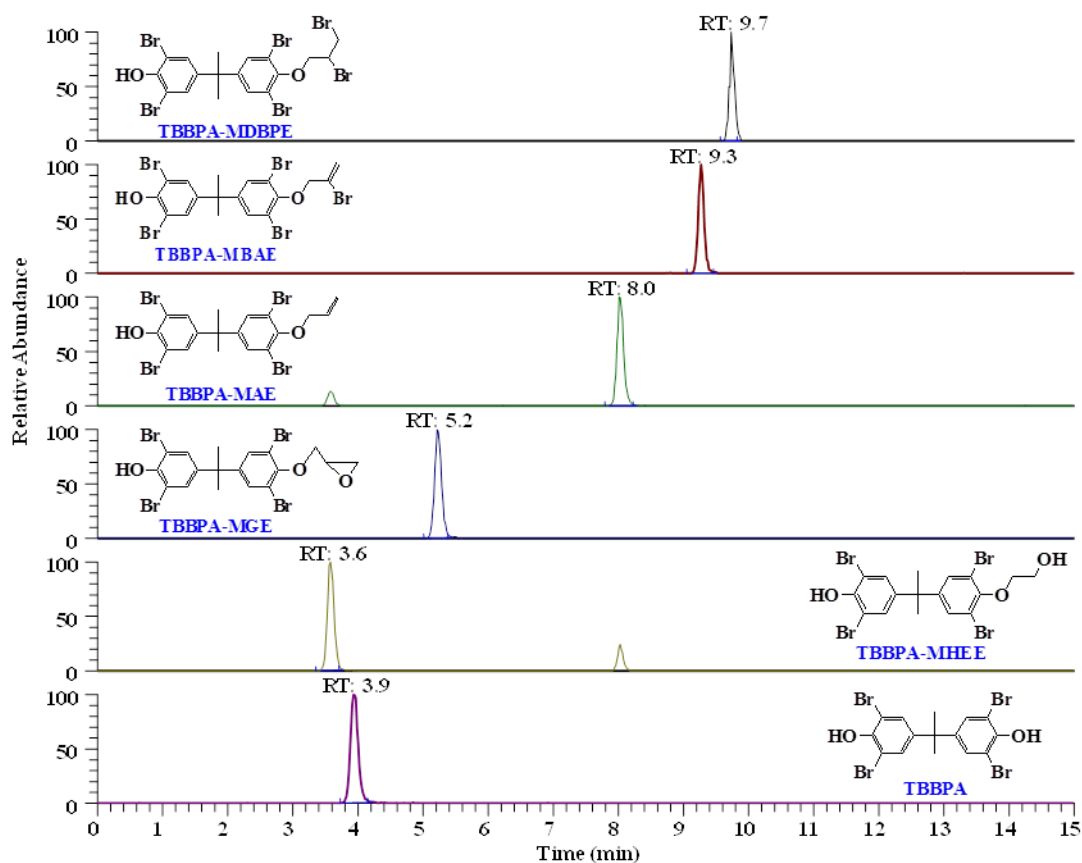

**Figure S2. Mass chromatography of TBBPA and five TBBPA byproducts or possible transformation products.**

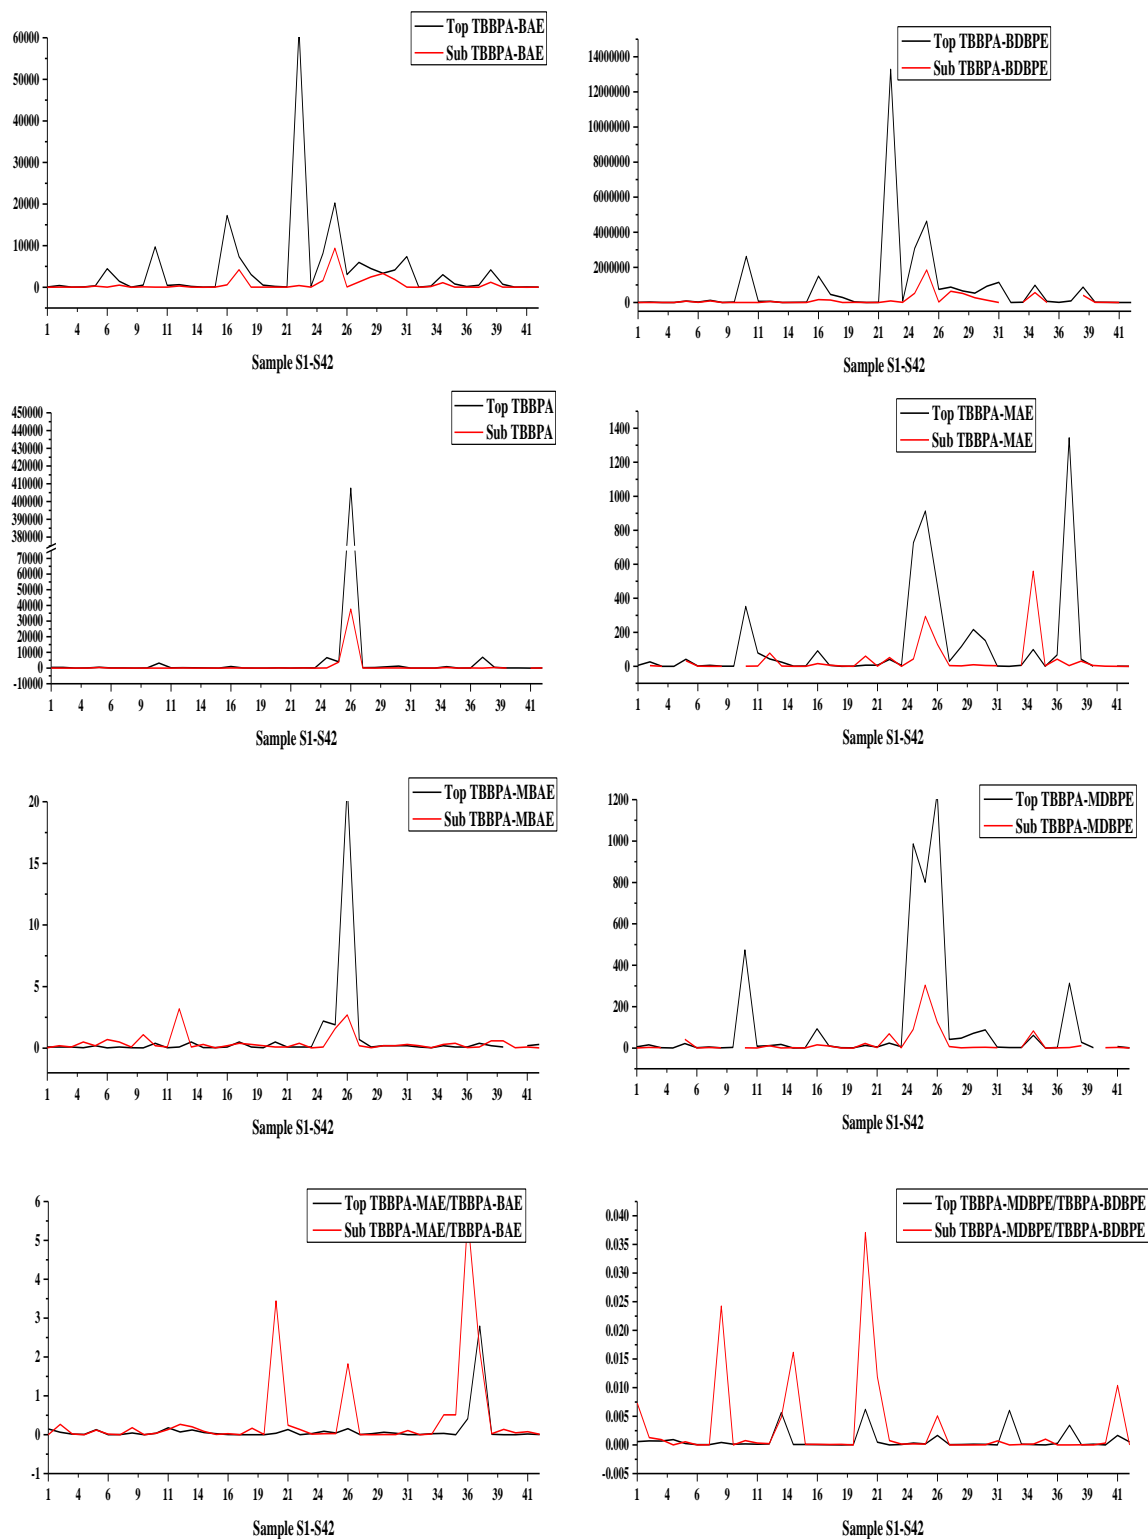

**Figure S3. Concentration distribution in the top layer and sublayer soil samples for TBBPA, main derivatives and byproducts.**

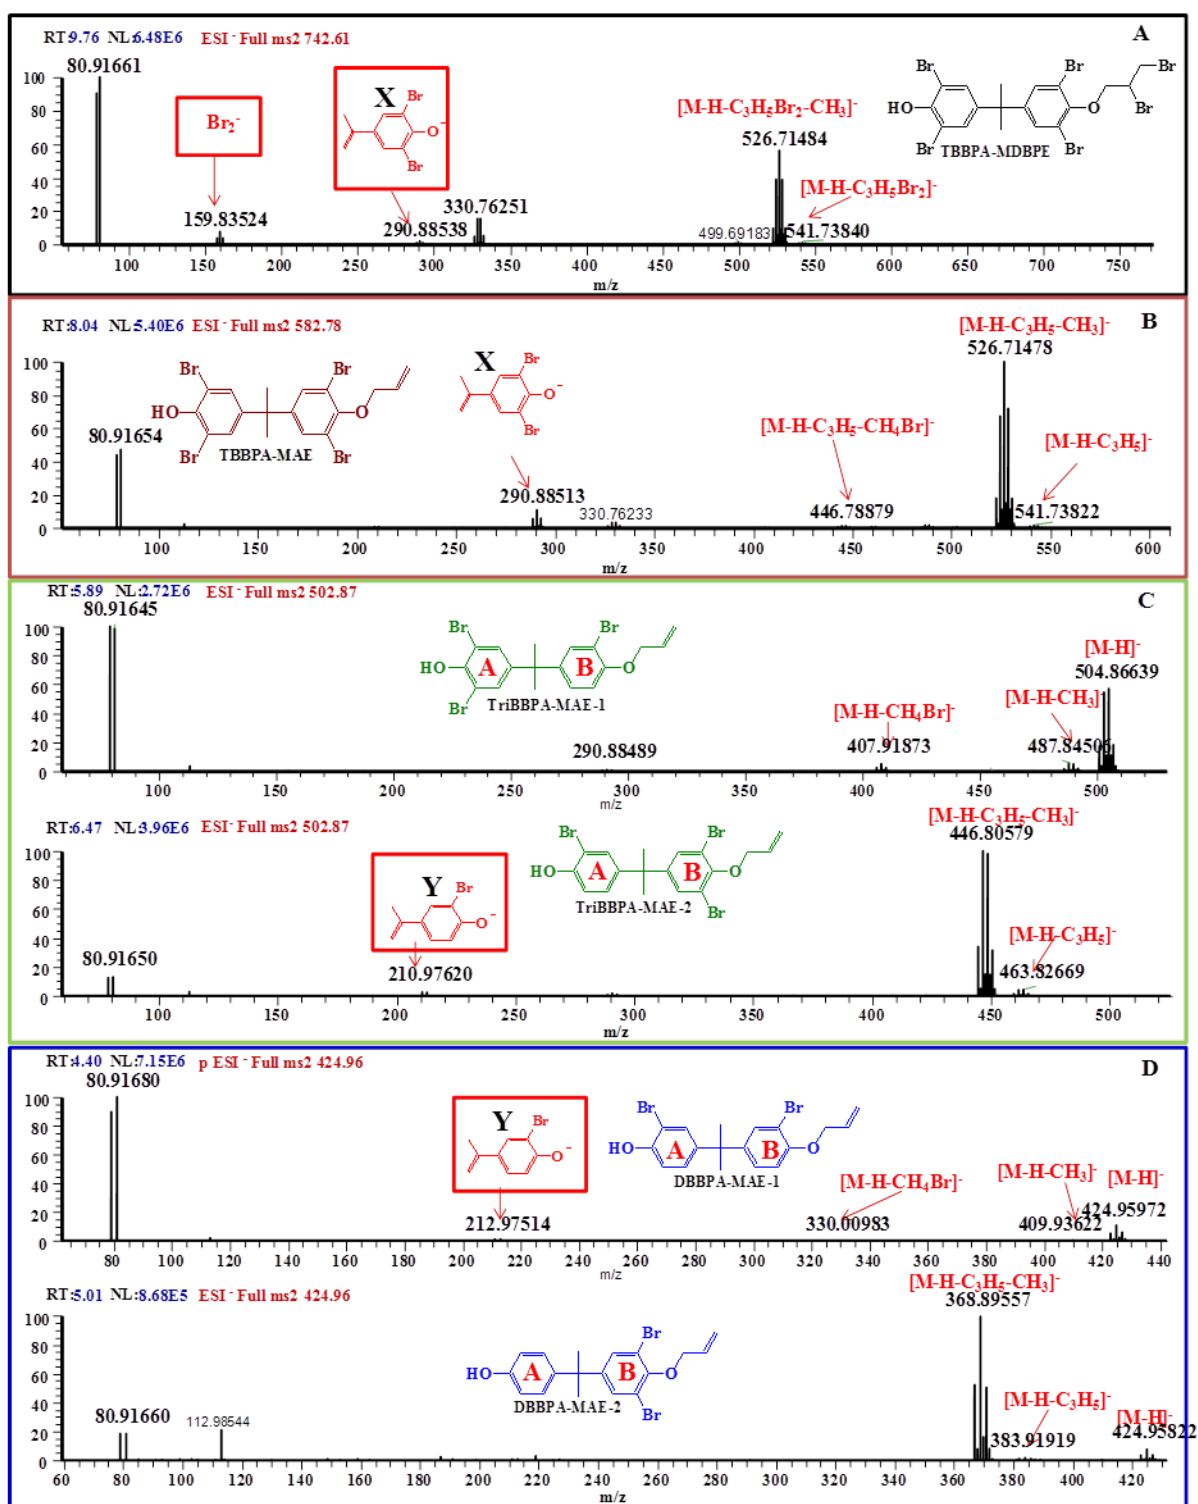

**Figure S4.** Mass spectrum of TBBPA-MDBPE, TBBPA-MAE and CCAs transformation products detected at RTs of 5.9/6.5, 4.4/5.0 min.

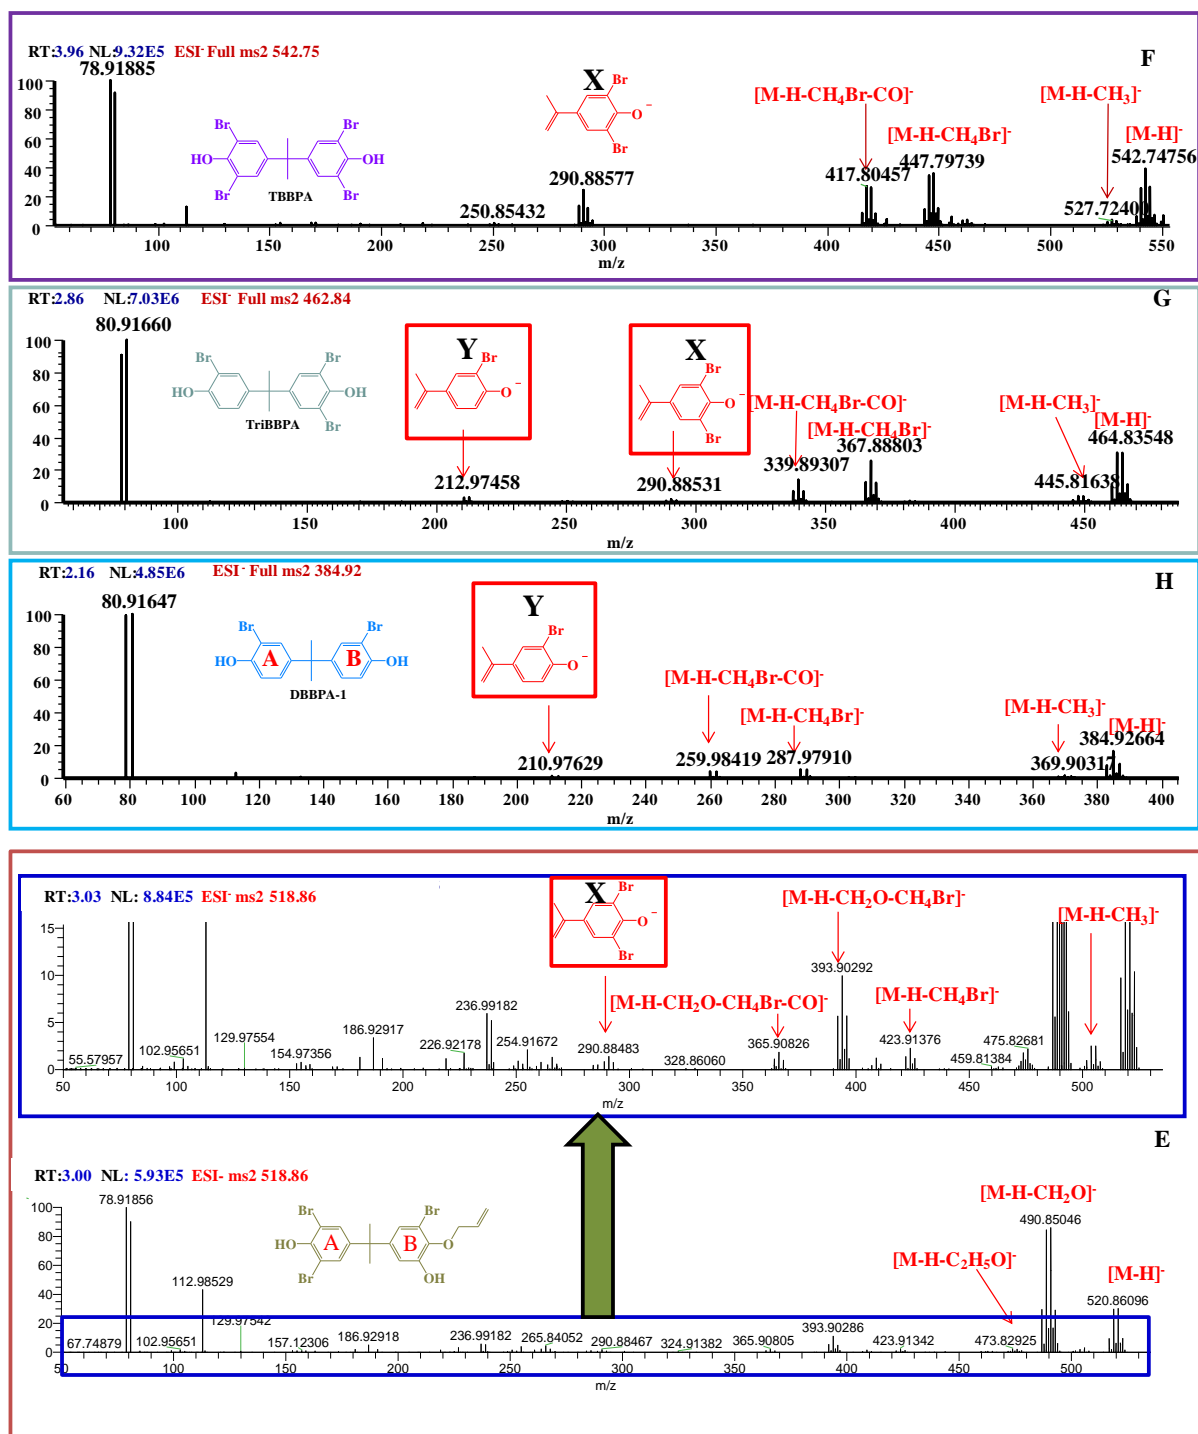

**Figure S5.** Mass spectrum of TBBPA and the CCAs transformation products detected at RTs of 2.9, 2.2 min and 3.0 min.



**Structure Identification through the MS<sup>2</sup> Spectra of Figure S4 and S5.** The same fragmentation steps of TriBBPA-MAE, TriBBPA-MAE (RT 6.5 min) and DBBPA-MAE (RT 5.0 min) for the precursor [M-H]<sup>-</sup> were observed by producing the segments [M-H-C<sub>3</sub>H<sub>5</sub>]<sup>-</sup> and [M-H-C<sub>3</sub>H<sub>5</sub>-CH<sub>3</sub>]<sup>-</sup>, which indicated the cleavage of ether bond and the loss of  $\bullet$ CH<sub>3</sub>. TriBBPA-MAE (RT 6.5 min) and DBBPA-MAE (RT 5.0 min) probably had the similar structures with TBBPA-MAE, which indicated there are two bromine atoms at aromatic ring B. The two bromine atoms at aromatic ring B would be helpful for the cleavage of ether bond to form [M-C<sub>3</sub>H<sub>5</sub>]<sup>-</sup> in mass analysis. So the possible structures of TriBBPA-MAE (RT 6.5 min) and DBBPA-MAE (RT 5.0 min) would be TriBBPA-MAE-2 and DBBPA-MAE-2 in Figure S5, respectively. TriBBPA-MAE (RT 5.9 min) and DBBPA-MAE (RT 4.4 min), TriBBPA, DBBPA showed similar fragmentation behaviors with TBBPA by forming the segments [M-H-CH<sub>3</sub>]<sup>-</sup> and [M-H-CH<sub>4</sub>Br]<sup>-</sup>. TBBPA has been reported to form 4-isopropylene-2,6-dibromophenol with a rearrangement of propyl group by the loss of dibromophenol moiety.<sup>1, 2</sup> The same fragments were also observed in the MS<sup>2</sup> spectra of TBBPA-MDBPE, TBBPA-MAE, TBBPA and TriBBPA (Figure S4 and S5, X). A 4-isopropylene-2,6-dibromophenol fragment was also observed in the MS<sup>2</sup> spectrum of HTriBBPA-MAE (Figure S5 E) which indicated there were two bromine atoms at aromatic ring A and the hydroxyl group might at ring B. The daughter ions at m/z 210.97620/212.97513 for TriBBPA-MAE, DBBPA-MAE, TriBBPA and DBBPA (Figure S4, S5, Y) might be 4-isopropylene-2-bromophenol formed by the fragmentation at the same position with TBBPA-MDBPE, TBBPA-MAE, TBBPA and TriBBPA. Meanwhile, the daughter ion clusters at m/z 210.97705/212.97498 detected in DBBPA MS<sup>2</sup> spectrum (Figure S5 Y) indicated there was one bromine atom at ring A and B, respectively. The possible structures of the transformation products were shown in Figure S4 and S5. Further confirmation about the structures of the isomers is still relied on the commercial available standards of these compounds.

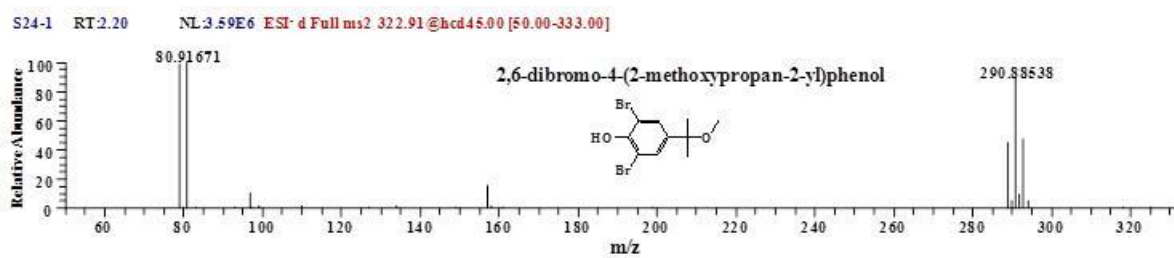

Figure S6. MS<sup>2</sup> spectrum of the non-targeted chemical NO.9.

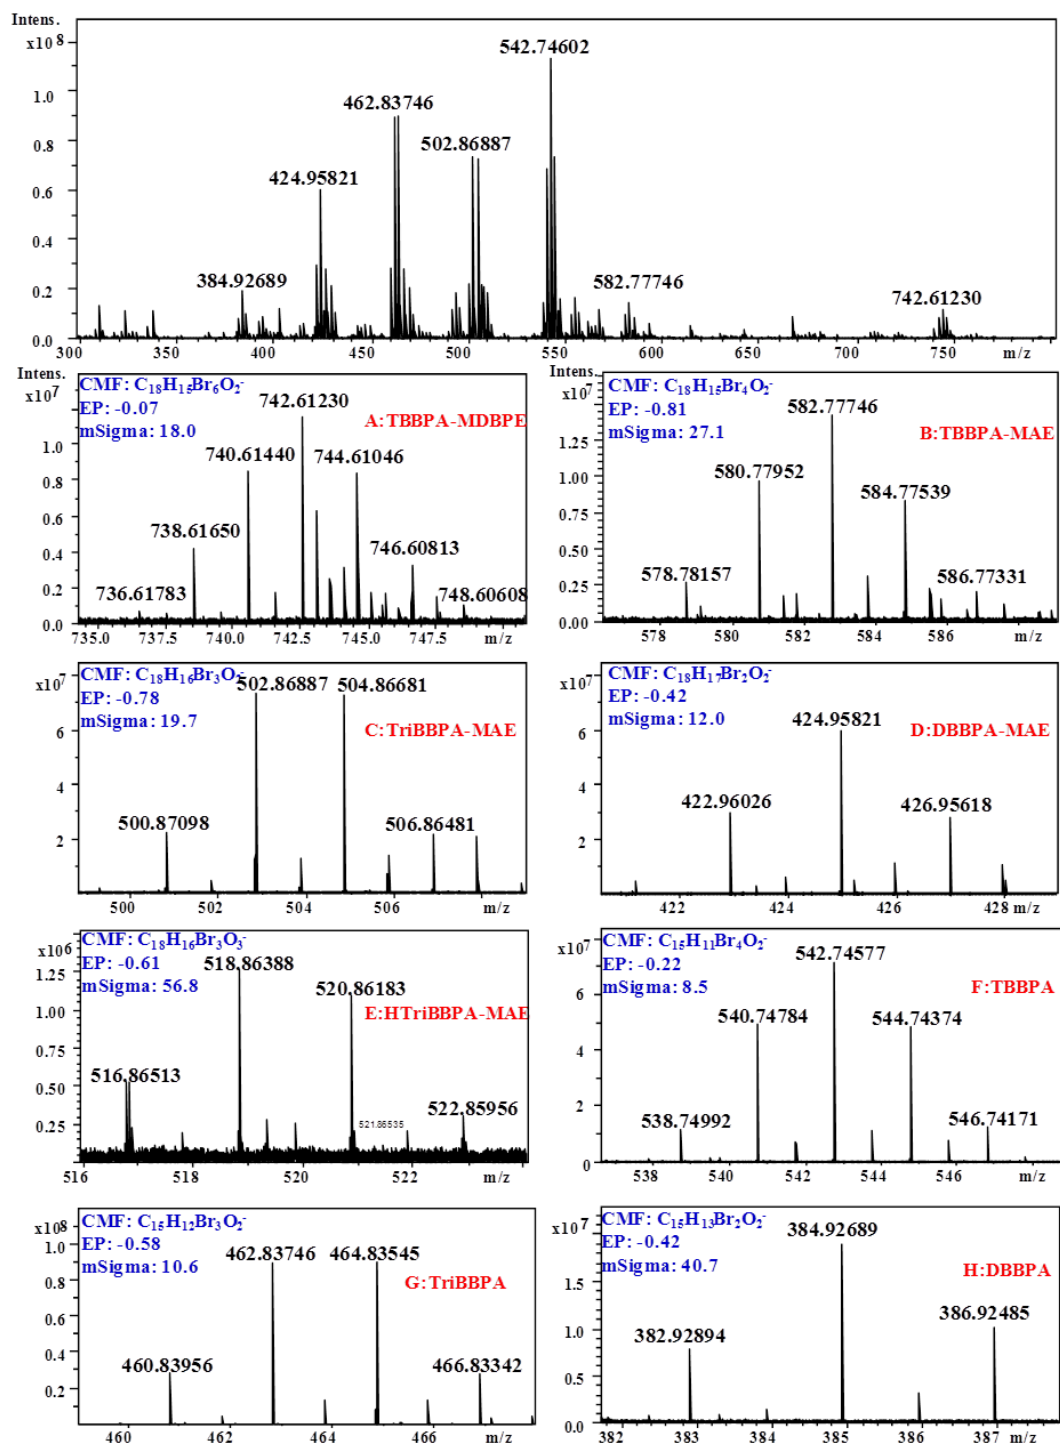

**Figure S7.** FTICR-MS spectra of the transformation products of TBBPA-MDBPE. **CMF**, calculated molecular formula given by Bruker Daltonics SmartFormula with a mass deviation tolerance of 1 ppm; **EP**, error ppm, the value expresses the deviation with the theoretical molecular formula; **mSigma**, the isotope pattern matching factor, indicates the agreement between the measured and the theoretical isotopic pattern of the target compounds.

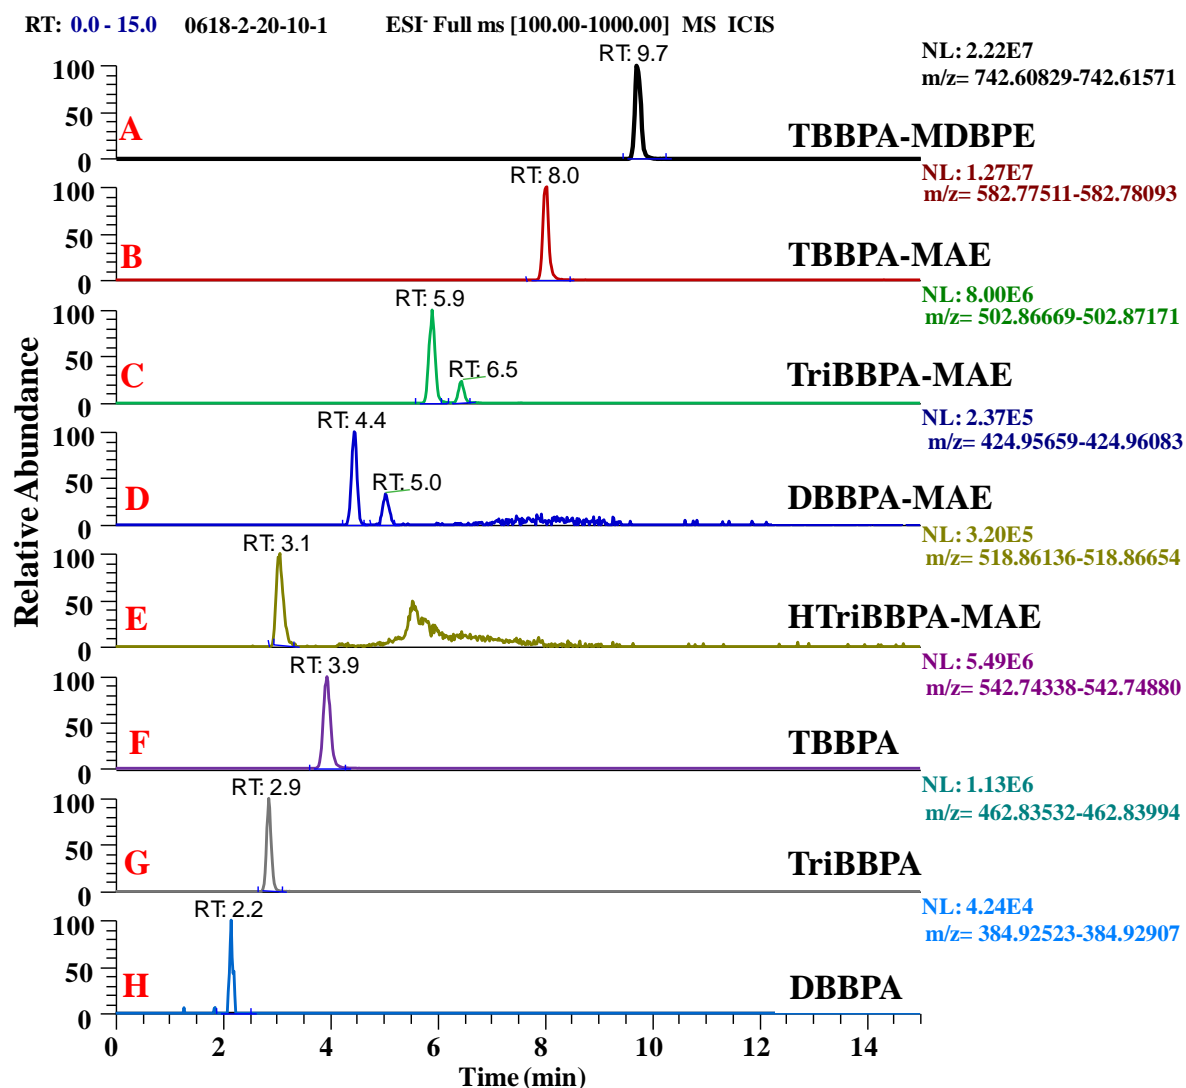

Figure S8. Mass chromatography of transformation products of TBBPA-MDBPE.

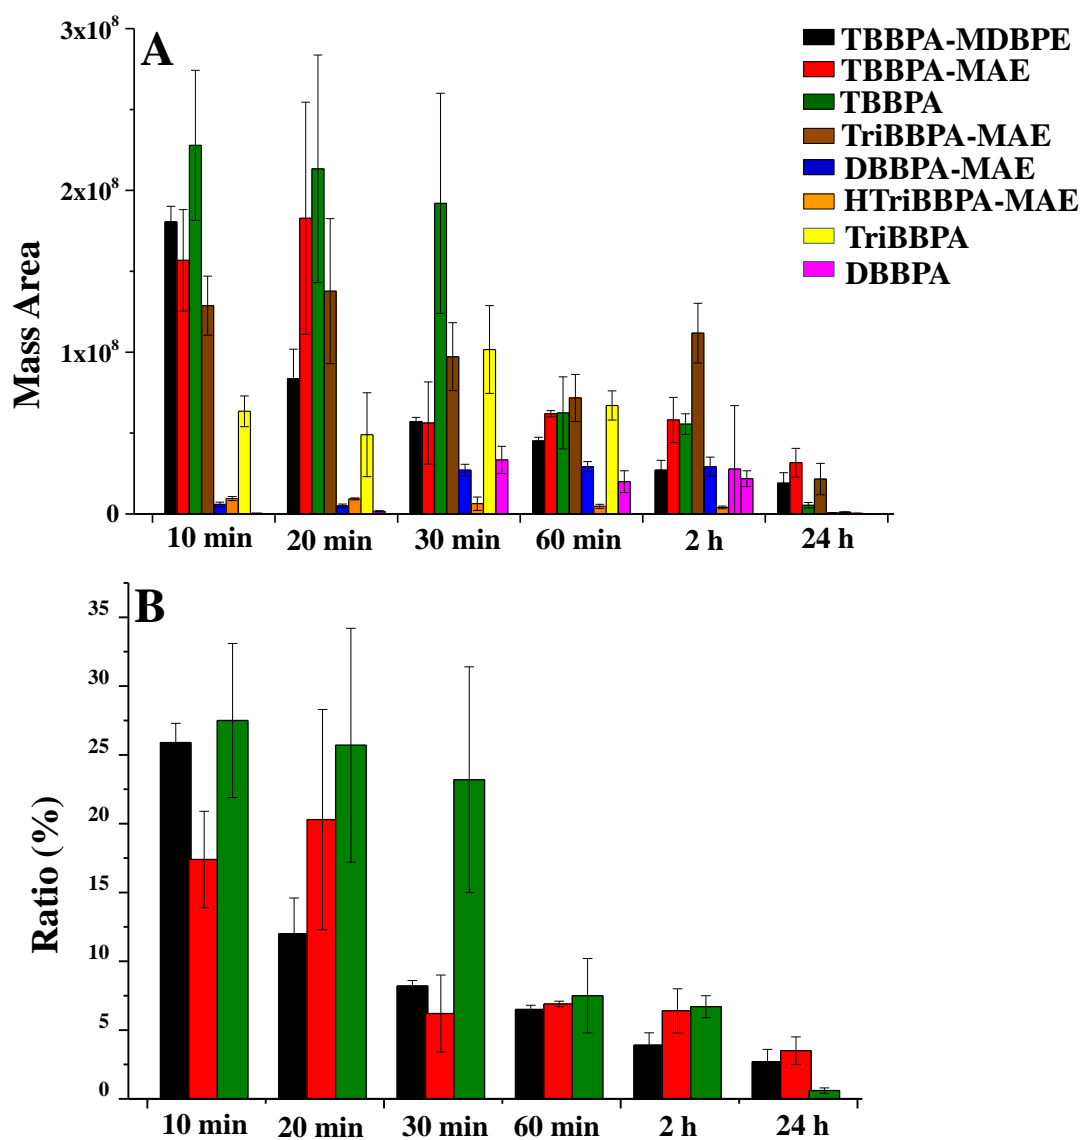

**Figure S9. Transformation of TBBPA-MDBPE in 24 hours.** (A) based on the mass area of the analytes. (B) based on the molar ratio of the analytes compared to the initial TBBPA-MDBPE.

---

## Synthesis Procedure and $^1\text{H}$ NMR Data.

### ***TBBPA-MDHPE***

To a solution of TBBPA-MAE (584 mg) in acetone (2 mL) and water (5 mL), NMO (N-methyl morpholine-n-oxide) and  $\text{OsO}_4$  was added at room temperature under the protection of  $\text{N}_2$  flow. After the reaction mixture was stirred under ice bath condition for 2 hours, then at room temperature for 12 hours. After the reaction was completed, the reaction mixture was added 200 mg sodium dithionite, 2 g magnesium silicate and diluted with 8 mL water. After being shaken for 30 minutes the residue was removed. The solution was adjusted to pH=2 with  $\text{H}_2\text{SO}_4$ , and extracted with DCM and purified with gel chromatography, giving TBBPA-MDHPE in a yield of 87%.

$^1\text{H}$ NMR (400 MHz, DMSO)  $\delta$  9.858 (s, 1 H), 7.439 (s, 2 H), 7.368 (s, 2 H), 4.960 (s, 1H), 4.619 (s, 1 H), 3.861-3.899 (t, 3 H), 3.426-3.538 (m, 1 H), 3.341-3.415 (d,  $J=29.6$  Hz, 1 H), 1.586 (s, 6 H); UHPLC-Orbitrap-HRMS (ESI) calcd for  $\text{C}_{18}\text{H}_{17}\text{Br}_4\text{O}_4^-$   $[\text{M} - \text{H}]^-$  616.78249, found 616.78241.

### ***TBBPA-MBHPE***

To a solution of TBBPA-MGE (600 mg) in  $\text{CHCl}_3$  (30 mL), 82  $\mu\text{L}$  HBr (47% in water) was added dropwise. After being stirred at room temperature for 8 hours, the reaction mixture was diluted with 50 mL water and extracted with DCM. After concentrated with rotary evaporator, the residue was purified with gel chromatography, giving TBBPA-MBHPE in a yield of 85%.

$^1\text{H}$ NMR (400 MHz, DMSO)  $\delta$  9.844 (s, 1 H), 7.455 (s, 2 H), 7.371 (s, 2 H), 5.602-5.616 (d,  $J=5.6$  Hz, 1H), 4.060-4.113 (m, 1 H), 3.932-3.946 (d,  $J=5.6$  Hz, 2 H), 3.719-3.755 (m, 1 H), 3.577-3.617 (m, 1 H), 1.589 (s, 6 H); UHPLC-Orbitrap-HRMS (ESI) calcd for  $\text{C}_{18}\text{H}_{16}\text{Br}_3\text{O}_3^-$   $[\text{M} - \text{H}]^-$  678.69809/680.69604, found 678.69812/680.69598.

### ***TBBPA-MHPE***

To a solution of TBBPA-MAE (584 mg) in anhydrous THF (20 mL), 9-BBN (9-Borabicyclo [3.3.1] nonane, 610 mg) was added at room temperature. After the reaction

---

mixture was stirred under a mild N<sub>2</sub> flow for 12 hours, 3 mL Sodium hydroxide solution (360 mg in 3 mL water) was added at one time, then, 3 mL H<sub>2</sub>O<sub>2</sub> (30%) was added dropwise in 10 to 15 minutes. The reaction mixture was then stirred at room temperature for 5 hours. After the reaction was completed, the reaction mixture was diluted with CH<sub>2</sub>Cl<sub>2</sub> and washed with saturated solution of sodium bicarbonate and water. The organic layer was dried over anhydrous MgSO<sub>4</sub>. After removal of the organic solvent, the residue was purified by column chromatography, giving TBBPA-MHPE in a yield of 60%.

<sup>1</sup>HNMR (400 MHz, DMSO)  $\delta$  7.437 (s, 2 H), 7.364 (s, 2 H), 4.016-3.983 (t,  $J$  = 13.2, 6.8 Hz, 2 H), 3.624-3.593 (t,  $J$  = 12.4, 6.4 Hz, 2 H), 2.083 (s, 2 H), 1.960-1.896 (m, 2 H), 1.585 (s, 6 H); UHPLC-Orbitrap-HRMS (ESI) calcd for C<sub>18</sub>H<sub>17</sub>Br<sub>4</sub>O<sub>3</sub><sup>-</sup> [M - H]<sup>-</sup> 600.78757, found 600.78748.

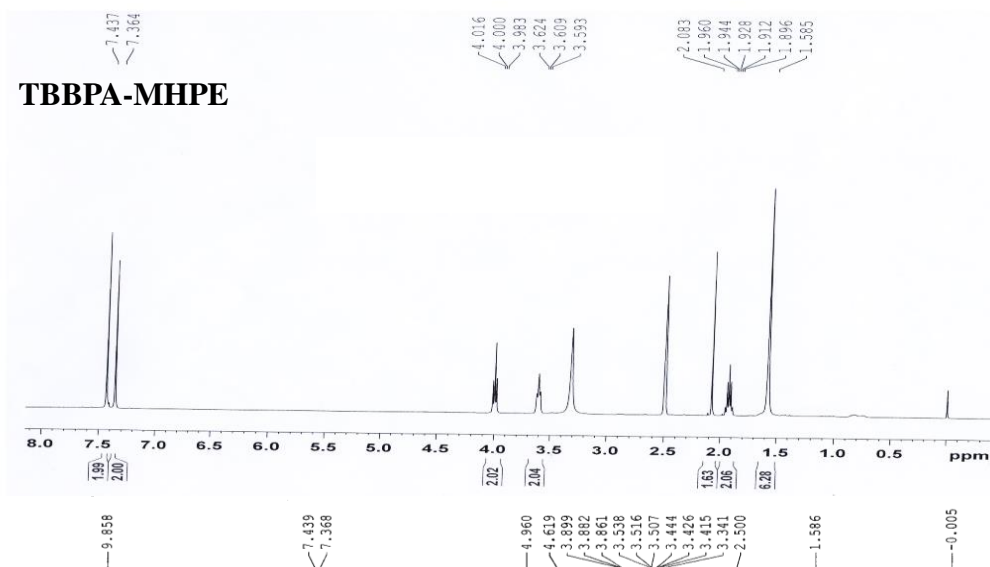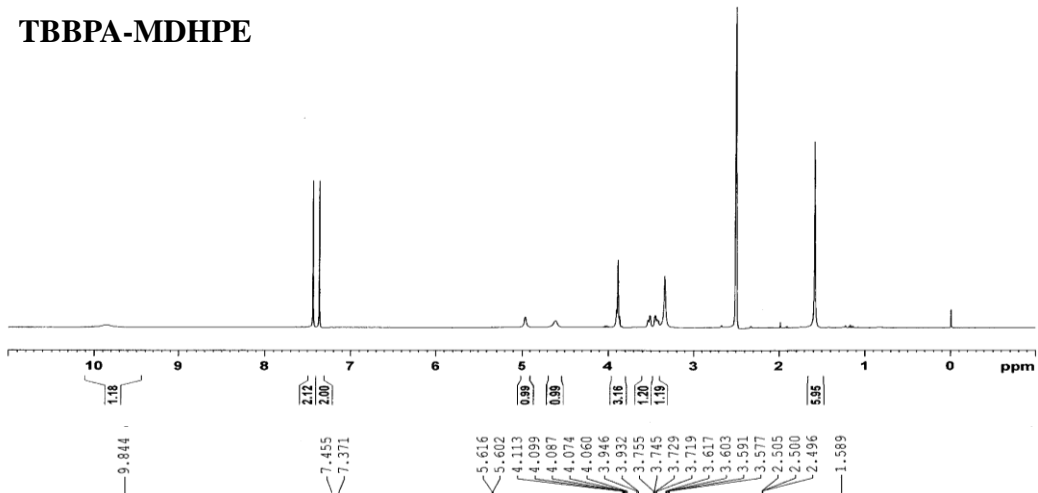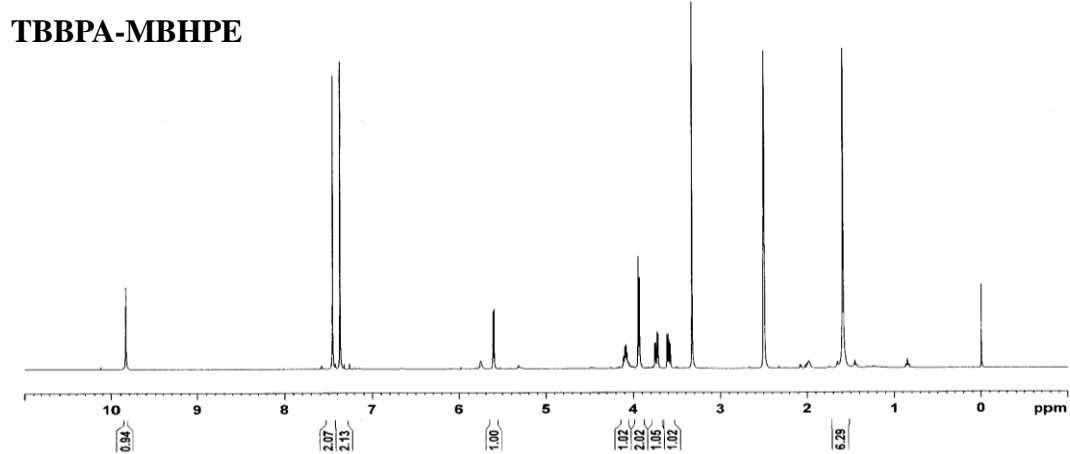

**Figure S10.**  $^1\text{H}$ NMR spectrum of synthesized TBBPA-MHPE, RBBPA-MDHPE and TBBPA-MBHPE.



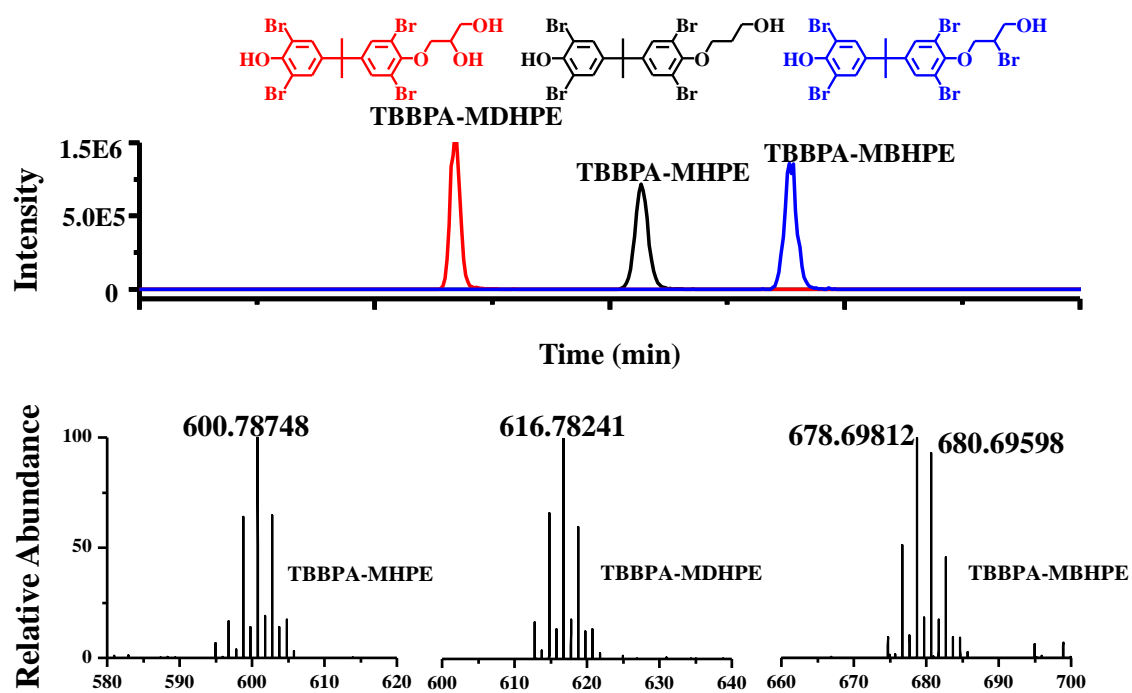

**Figure S11. HRMS chromatography and spectra of synthesized TBBPA-MDHPE, TBBPA-MBHPE and TBBPA-MHPE.**

**Table S1. Chemicals and their structures detected in transformation process and soil samples.**

| Chemicals NO. | Abbreviation | Full name                                 | Structure <sup>a</sup> or possible structure <sup>b</sup>                                          |
|---------------|--------------|-------------------------------------------|----------------------------------------------------------------------------------------------------|
| 1             | TBBPA-MBHPE  | TBBPA mono(2-bromo-3-hydroxypropyl ether) | 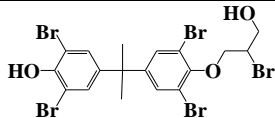 <sup>a</sup>   |
| 2             | TBBPA-MDHPE  | TBBPA mono(2,3-dihydroxypropyl ether)     |  <sup>a</sup>   |
| 3             | TBBPA-MHPE   | TBBPA mono(3-hydroxypropyl ether)         |  <sup>a</sup>   |
| 4             | TBBPA-MME    | TBBPA mono(methyl ether)                  |  <sup>a</sup>   |
| 5             | TriBBPA-MAE  | TriBBPA mono (allyl ether)                |  <sup>b</sup>   |
| 6             | DBBPA-MAE    | DBBPA mono (allyl ether)                  |  <sup>b</sup>  |
| 7             | TriBBPA      | tribromobisphenol A                       |  <sup>a</sup> |
| 8             | DBBPA        | dibromobisphenol A                        |  <sup>b</sup> |

## Continued

| Chemicals NO. | Abbreviation | Full name                                           | Structure <sup>a</sup> or possible structure <sup>b</sup>                             |              |
|---------------|--------------|-----------------------------------------------------|---------------------------------------------------------------------------------------|--------------|
| 9             |              | 2,6-dibromo-4-(2-methoxypropan-2-yl)phenol          | 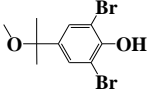   | <sup>b</sup> |
|               |              | 2,6-dibromo-4-(2-(2-hydroxy)-propyl)-methoxybenzene |    | <sup>b</sup> |
| 10            | DBP          | dibromophenol                                       |    | <sup>b</sup> |
| 11            | TriBP        | tribromophenol                                      |    | <sup>b</sup> |
| 12            | TeBP         | tetrabromophenol                                    |    | <sup>b</sup> |
| 13            | MHDBDE       | methoxyl-hydroxy-dibromobisphenylether              |                                                                                       |              |
| 14            | HPBDE        | hydroxy-pentabromodiphenylether                     |                                                                                       |              |
| 15            | TBBPA        | tetrabromobisphenol A                               |    | <sup>a</sup> |
| 16            | TBBPA-MAE    | TBBPA mono(allyl ether)                             |  | <sup>a</sup> |
| 17            | TBBPA-MBAE   | TBBPA mono(2-bromoallyl ether)                      |  | <sup>a</sup> |

Continued

| Chemicals NO. | Abbreviation | Full name                           | Structure <sup>a</sup> or possible structure <sup>b</sup>                            |              |
|---------------|--------------|-------------------------------------|--------------------------------------------------------------------------------------|--------------|
| 18            | TBBPA-MDBPE  | TBBPA mono(2,3-dibromopropyl ether) | 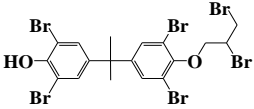  | <sup>a</sup> |
| 19            | TBBPA-MHEE   | TBBPA mono(2-hydroxyethyl ether)    |   | <sup>a</sup> |
| 20            | TBBPA-MGE    | TBBPA mono(glycidyl ether)          |   | <sup>a</sup> |
| 21            | TBBPA-BAE    | TBBPA bis(allyl ether)              |   | <sup>a</sup> |
| 22            | TBBPA-BDBPE  | TBBPA bis(2,3-dibromopropyl ether)  |  | <sup>a</sup> |

**Table S2. Instrumental parameters of FT-ICR MS.**

| <b>API Source and Mode</b> |           |                        |                      |
|----------------------------|-----------|------------------------|----------------------|
| <i>API Source</i>          |           | <i>Mode</i>            |                      |
| Source Type                | ESI (-)   | Detection mode         | Broadband            |
| Capillary +                | 4000 V    | TD(acquisition)        | 4M                   |
| End Plate Offset           | —500 V    | TD(Tune/Display)       | 4M (Full Resolution) |
| Dry Gas                    | 2.0 L/min | Estimate R.P           | 240000 at m/z 400    |
| Dry Tem                    | 180 °C    | Transient Length       | 0.8389 sec           |
| <b>Ion Transfer</b>        |           |                        |                      |
| <i>Source Optics</i>       |           | <i>Collision Cell</i>  |                      |
| Capillary Exit             | —200.0 V  | Collision Voltage      | 4.0 V                |
| Deflector Plate            | —180.0 V  | DC Extract Bias        | (-0.5) V             |
| Funnel 1                   | —100 V    | RF frequency           | 2 MHz                |
| Skimmer 1                  | —25.0 V   | Collision RF           |                      |
| Funnel RF Amplitude        | 130.0 vpp | Amplitude              | 600.0 vpp            |
| <i>Octopole</i>            |           | <i>Transfer Optics</i> |                      |
| Trekuensi                  | 5 MHz     | Time of Flight         | 0.6 ms               |
| RF Amplitude               | 200.0 vpp | Frequency              | 2 MHz                |
| <i>Quadrupole</i>          |           | RF Amplitude           | 150.0 vpp            |
| Q1 Mass                    | 100.0 m/z |                        |                      |

**Table S3. Method performance data for the analytical method.**

|      |              | TBBPA | TBBPA<br>-BAE | TBBPA-<br>BDBPE | TBBPA<br>-MAE | TBBPA<br>-MBAE | TBBPA-<br>MDBPE | TBBPA-<br>MGE | TBBPA-<br>MHEE | TBBPA<br>-MHPE | TBBPA<br>-MDHPE | TBBPA<br>-MBHPE |
|------|--------------|-------|---------------|-----------------|---------------|----------------|-----------------|---------------|----------------|----------------|-----------------|-----------------|
| Soil | Recovery     | 85%   | 94%           | 95%             | 78%           | 86%            | 92%             | 86%           | 88%            | 92%            | 94%             | 95%             |
|      | MDL(ng/g dw) | 0.1   | 0.4           | 3               | 0.02          | 0.02           | 0.09            | 0.08          | 0.09           | 0.06           | 0.12            | 0.06            |

**Table S4. Targeted concentrations (ng/g dw) of TBBPA analogs in soil samples. <sup>a</sup>**

|       | TBBPA<br>-BAE | TBBPA-<br>BDBPE | TBBPA  | TBBPA<br>-MAE | TBBPA<br>-MBAE | TBBPA<br>-MDBPE | TBBPA<br>-MHEE | TBBPA<br>-MDHPE | TBBPA<br>-MHPE | TBBPA<br>-MGE | TBBPA<br>-MBHPE | TOC   | PH   |
|-------|---------------|-----------------|--------|---------------|----------------|-----------------|----------------|-----------------|----------------|---------------|-----------------|-------|------|
| S1-1  | 40.0          | 9862.2          | 444.9  | 6.0           | 0.1            | 5.8             | ND             | ND              | ND             | ND            | 0.2             | 0.67% | 8.15 |
| S1-2  | 2.0           | 41.0            | 3.7    | ND            | 0.04           | 0.3             | ND             | ND              | ND             | ND            | ND              | 0.24% | 8.40 |
| S2-1  | 413.3         | 21704.1         | 448.2  | 26.1          | 0.1            | 15.4            | ND             | ND              | ND             | 0.2           | 1.2             | 0.97% | 8.02 |
| S2-2  | 16.8          | 2579.5          | 18.2   | 4.5           | 0.2            | 3.3             | ND             | ND              | ND             | ND            | ND              | 0.52% | 8.08 |
| S3-1  | 20.3          | 2946.3          | 14.9   | 0.3           | 0.1            | 2.0             | ND             | ND              | ND             | ND            | ND              | 0.52% | 9.35 |
| S3-2  | 11.7          | 1842.5          | 9.8    | 0.2           | 0.1            | 1.7             | ND             | ND              | ND             | ND            | ND              | 0.47% | 8.80 |
| S4-1  | 53.8          | 530.2           | 39.8   | 0.3           | 0.04           | 0.5             | ND             | ND              | ND             | ND            | ND              | 0.26% | 8.24 |
| S4-2  | 4.1           | 195.7           | 2.4    | ND            | 0.5            | ND              | ND             | ND              | ND             | ND            | ND              | 0.36% | 8.15 |
| S5-1  | 317.3         | 82256.9         | 486.4  | 41.2          | 0.2            | 21.6            | 0.05           | ND              | 1.0            | 0.5           | 0.8             | 1.17% | 8.33 |
| S5-2  | 273.2         | 77542.9         | 309.0  | 32.6          | 0.2            | 42.7            | ND             | ND              | 1.7            | ND            | 0.2             | 1.14% | 8.06 |
| S6-1  | 4464.5        | 27270.7         | 69.8   | 1.2           | 0.03           | 1.6             | ND             | ND              | ND             | ND            | 0.2             | 0.31% | 8.54 |
| S6-2  | 33.0          | 7209.6          | 19.7   | 0.5           | 0.7            | 0.1             | ND             | ND              | ND             | ND            | ND              | 0.46% | 8.64 |
| S7-1  | 1441.3        | 123625.6        | 109.6  | 5.4           | 0.1            | 5.5             | ND             | ND              | 0.04           | ND            | ND              | 0.18% | 8.49 |
| S7-2  | 505.3         | 90310.8         | 15.2   | 0.3           | 0.5            | 2.5             | ND             | ND              | ND             | ND            | ND              | 1.24% | 7.39 |
| S8-1  | 17.6          | 2560.1          | 19.8   | 0.8           | 0.04           | 1.1             | ND             | ND              | ND             | ND            | 0.2             | 0.72% | 8.29 |
| S8-2  | 1.1           | 37.1            | 1.4    | 0.2           | 0.1            | 0.9             | ND             | ND              | ND             | ND            | ND              | 0.80% | 8.46 |
| S9-1  | 512.0         | 21621.0         | 22.6   | 0.7           | 0.03           | 2.9             | ND             | ND              | ND             | ND            | ND              | 0.28% | 8.39 |
| S9-2  | 85.0          | 2506.8          | 2.9    | ND            | 1.1            | ND              | ND             | ND              | ND             | ND            | ND              | 0.49% | 7.70 |
| S10-1 | 9703.3        | 2624049.6       | 3214.9 | 351.8         | 0.4            | 474.2           | 3.7            | 0.5             | 3.3            | 4.6           | 12.5            | 1.41% | 7.46 |
| S10-2 | 14.2          | 1441.4          | 10.1   | 0.5           | 0.2            | 1.1             | ND             | ND              | ND             | ND            | ND              | 0.36% | 8.32 |
| S11-1 | 441.2         | 68755.9         | 187.8  | 78.7          | 0.04           | 8.5             | ND             | ND              | 0.1            | 1.1           | 1.6             | 0.54% | 8.18 |
| S11-2 | 12.8          | 2109.4          | 6.6    | 1.7           | 0.1            | 0.7             | ND             | ND              | ND             | ND            | ND              | 0.28% | 9.46 |
| S12-1 | 620.4         | 67960.9         | 223.9  | 42.9          | 0.1            | 11.3            | ND             | ND              | ND             | 0.7           | 2.0             | 0.06% | 8.31 |
| S12-2 | 291.6         | 53879.0         | 58.3   | 77.4          | 3.2            | 11.6            | ND             | ND              | ND             | 4.3           | 3.4             | 0.85% | 7.96 |
| S13-1 | 195.5         | 3055.5          | 143.0  | 24.2          | 0.5            | 17.3            | ND             | ND              | ND             | 1.1           | 1.5             | 0.67% | 8.40 |
| S13-2 | 6.9           | 146.1           | 15.9   | 1.4           | 0.1            | 0.7             | ND             | ND              | ND             | ND            | ND              | 0.38% | 8.13 |
| S14-1 | 15.8          | 5987.7          | 43.1   | 0.9           | 0.05           | 0.5             | ND             | ND              | ND             | ND            | ND              | 0.46% | 8.05 |
| S14-2 | 3.5           | 111.3           | 3.0    | 0.3           | 0.3            | 1.8             | ND             | ND              | ND             | ND            | ND              | 0.83% | 7.94 |
| S15-1 | 60.0          | 13520.0         | 18.3   | 1.6           | 0.05           | 1.1             | ND             | ND              | ND             | ND            | ND              | 0.61% | 8.32 |
| S15-2 | 15.9          | 2850.3          | 0.1    | 0.1           | 0.03           | 0.3             | ND             | ND              | ND             | ND            | ND              | 0.35% | 8.48 |
| S16-1 | 17244.1       | 1504072.6       | 944.9  | 91.4          | 0.1            | 93.1            | 0.1            | 0.2             | 0.1            | 1.0           | 3.5             | 0.66% | 8.75 |
| S16-2 | 571.4         | 164960.2        | 59.4   | 15.8          | 0.2            | 15.3            | ND             | ND              | ND             | ND            | 0.4             | 0.85% | 8.40 |
| S17-1 | 7361.5        | 461392.0        | 35.0   | 5.8           | 0.5            | 10.0            | ND             | ND              | ND             | ND            | ND              | 0.90% | 8.65 |
| S17-2 | 4203.8        | 136308.4        | 31.3   | 6.6           | 0.4            | 10.0            | ND             | ND              | ND             | ND            | ND              | 0.58% | 8.93 |
| S18-1 | 3048.0        | 285903.1        | 1.2    | 0.1           | 0.1            | 2.0             | ND             | ND              | ND             | ND            | ND              | 0.54% | 8.78 |
| S18-2 | 10.3          | 1882.5          | 0.6    | 1.7           | 0.3            | 0.2             | ND             | ND              | ND             | ND            | ND              | 0.43% | 9.12 |
| S19-1 | 495.5         | 30093.5         | 4.5    | 0.8           | 0.04           | 1.3             | ND             | ND              | ND             | ND            | 0.2             | 0.57% | 8.98 |
| S19-2 | 29.4          | 9072.3          | 0.8    | 0.2           | 0.2            | 0.04            | ND             | ND              | ND             | ND            | ND              | 0.73% | 8.40 |
| S20-1 | 179.0         | 2011.0          | 138.8  | 6.6           | 0.5            | 12.5            | ND             | ND              | ND             | 0.4           | 0.5             | 0.62% | 8.47 |
| S20-2 | 17.3          | 598.7           | 68.5   | 59.6          | 0.1            | 22.2            | ND             | 0.2             | 0.4            | 1.2           | 1.3             | 0.70% | 8.32 |
| S21-1 | 50.0          | 11717.2         | 5.0    | 6.7           | 0.1            | 5.5             | ND             | ND              | ND             | ND            | ND              | 0.42% | 8.27 |
| S21-2 | 4.1           | 235.1           | 2.1    | 1.0           | 0.1            | 2.8             | ND             | ND              | ND             | ND            | ND              | 0.27% | 8.86 |
| S22-1 | 61926.1       | 13283014.4      | 135.9  | 40.6          | 0.1            | 23.6            | ND             | ND              | 0.1            | 0.6           | 0.6             | 0.46% | 8.50 |
| S22-2 | 387.1         | 92915.7         | 59.2   | 51.8          | 0.4            | 69.2            | ND             | 0.1             | 0.1            | 0.4           | 1.3             | 0.74% | 8.02 |
| S23-1 | 194.3         | 74170.1         | 79.8   | 5.4           | 0.1            | 6.6             | ND             | ND              | ND             | ND            | 0.3             | 0.92% | 8.18 |
| S23-2 | 20.2          | 5064.4          | 19.7   | 0.3           | 0.03           | 0.8             | ND             | ND              | ND             | ND            | ND              | 0.60% | 8.63 |

Continued

|       | TBBPA<br>-BAE | TBBPA-<br>BDBPE | TBBPA    | TBBPA<br>-MAE | TBBPA<br>-MBAE | TBBPA<br>-MDBPE | TBBPA<br>-MHEE | TBBPA<br>-MDHPE | TBBPA<br>-MHPE | TBBPA<br>-MGE | TBBPA<br>-MBHPE | TOC   | PH   |
|-------|---------------|-----------------|----------|---------------|----------------|-----------------|----------------|-----------------|----------------|---------------|-----------------|-------|------|
| S24-1 | 8132.2        | 3086140.5       | 6628.1   | 727.1         | 2.2            | 987.0           | 13.7           | 20.4            | 18.1           | 25.9          | 85.0            | 0.90% | 7.81 |
| S24-2 | 1607.8        | 524651.8        | 26.6     | 42.9          | 0.1            | 89.9            | ND             | 0.2             | 0.3            | 1.0           | 4.0             | 0.71% | 8.63 |
| S25-1 | 20270.3       | 4634018.1       | 4021.8   | 913.2         | 1.9            | 800.1           | 10.4           | 17.5            | 14.9           | 64.4          | 78.5            | 0.45% | 8.44 |
| S25-2 | 9367.0        | 1854155.3       | 3852.8   | 293.7         | 1.6            | 303.5           | 0.1            | 2.0             | 0.2            | 3.7           | 14.5            | 0.89% | 8.07 |
| S26-1 | 3057.0        | 743373.6        | 407643.1 | 475.2         | 21.3           | 1233.6          | ND             | 0.01            | 178.8          | ND            | ND              | 0.49% | 8.40 |
| S26-2 | 70.8          | 24717.2         | 37704.5  | 129.4         | 2.7            | 125.8           | 0.2            | ND              | ND             | 1.5           | 1.4             | 0.50% | 8.23 |
| S27-1 | 5973.4        | 874815.1        | 205.8    | 29.6          | 0.7            | 42.0            | ND             | ND              | 0.1            | 1.4           | 0.3             | 0.41% | 8.31 |
| S27-2 | 1247.9        | 637692.5        | 112.0    | 4.1           | 0.2            | 7.2             | ND             | ND              | ND             | 0.1           | 0.4             | 0.81% | 7.84 |
| S28-1 | 4480.0        | 656660.4        | 302.5    | 115.6         | 0.1            | 48.2            | 0.4            | 1.2             | 1.0            | 5.1           | 4.5             | 0.63% | 8.31 |
| S28-2 | 2455.3        | 520014.0        | 0.4      | 2.3           | 0.04           | 0.8             | ND             | ND              | ND             | 0.2           | ND              | 2.28% | 7.65 |
| S29-1 | 3345.7        | 535754.9        | 780.9    | 216.7         | 0.2            | 71.5            | 0.5            | 3.8             | 3.1            | 15.6          | 11.5            | 1.58% | 7.91 |
| S29-2 | 3278.1        | 267571.5        | 87.8     | 8.9           | 0.2            | 3.4             | ND             | ND              | ND             | ND            | 0.6             | 0.21% | 8.37 |
| S30-1 | 4157.1        | 925566.5        | 1217.5   | 151.2         | 0.2            | 88.1            | 0.7            | 3.0             | 2.4            | 14.4          | 11.3            | 1.07% | 7.86 |
| S30-2 | 1852.2        | 132824.5        | 60.9     | 5.3           | 0.2            | 4.0             | ND             | ND              | ND             | 0.4           | 0.4             | 0.83% | 8.39 |
| S31-1 | 7366.0        | 1152208.8       | 19.7     | 1.9           | 0.2            | 4.8             | ND             | ND              | ND             | ND            | ND              | 1.07% | 8.28 |
| S31-2 | 30.0          | 2231.3          | 1.5      | 3.2           | 0.3            | 1.6             | ND             | ND              | ND             | ND            | 0.2             | 0.58% | 8.13 |
| S32-1 | 26.4          | 364.7           | 13.1     | 0.1           | 0.1            | 2.2             | ND             | ND              | ND             | ND            | ND              | 0.37% | 8.85 |
| S32-2 | 3.1           | ND              | 1.9      | ND            | 0.2            | ND              | ND             | ND              | ND             | ND            | ND              | 0.88% | 8.28 |
| S33-1 | 247.5         | 18729.1         | 5.4      | 6.0           | 0.04           | 2.3             | ND             | ND              | ND             | ND            | 0.2             | 0.42% | 8.43 |
| S33-2 | 149.1         | 15830.2         | 4.1      | 2.6           | 0.04           | 1.4             | ND             | ND              | ND             | ND            | 0.2             | 0.50% | 8.52 |
| S34-1 | 3029.4        | 985168.2        | 845.9    | 99.0          | 0.2            | 61.3            | ND             | ND              | ND             | 0.6           | 1.5             | 1.70% | 8.43 |
| S34-2 | 1091.7        | 568425.6        | 330.5    | 559.4         | 0.3            | 82.9            | 1.0            | 5.2             | 5.1            | 42.4          | 29.8            | 0.10% | 8.26 |
| S35-1 | 768.3         | 66188.2         | 15.7     | 0.1           | 0.1            | 0.6             | ND             | ND              | ND             | ND            | ND              | 0.60% | 8.73 |
| S35-2 | 4.1           | 393.0           | 11.7     | 2.1           | 0.4            | 0.4             | ND             | ND              | ND             | ND            | ND              | 0.57% | 8.88 |
| S36-1 | 162.3         | 9826.7          | 67.3     | 66.5          | 0.1            | 2.8             | ND             | ND              | 0.1            | 1.1           | 1.3             | 0.26% | 9.08 |
| S36-2 | 7.5           | ND              | 30.6     | 42.0          | 0.05           | 1.4             | ND             | ND              | ND             | 0.4           | 1.0             | 0.24% | 8.67 |
| S37-1 | 480.9         | 90928.5         | 6930.6   | 1344.6        | 0.4            | 313.7           | 1.9            | 6.6             | 5.8            | 19.9          | 36.2            | 0.58% | 9.47 |
| S37-2 | 2.0           | ND              | 20.2     | 4.3           | 0.1            | 2.3             | ND             | ND              | ND             | ND            | ND              | 0.41% | 9.35 |
| S38-1 | 4183.8        | 880374.8        | 388.6    | 41.5          | 0.2            | 28.1            | ND             | ND              | ND             | 0.3           | 0.4             | 1.23% | 8.31 |
| S38-2 | 1195.7        | 413453.9        | 297.2    | 30.6          | 0.6            | 11.7            | ND             | ND              | ND             | 0.4           | 0.6             | 2.45% | 7.93 |
| S39-1 | 695.5         | 18180.9         | 36.8     | 0.9           | 0.1            | 2.1             | ND             | ND              | ND             | ND            | ND              | 0.84% | 8.78 |
| S39-2 | 33.5          | 9153.6          | 9.0      | 4.6           | 0.6            | ND              | ND             | ND              | ND             | ND            | 1.7             | 0.59% | 8.58 |
| S40-1 | 31.9          | 11391.6         | 28.3     | ND            | ND             | ND              | ND             | ND              | ND             | ND            | ND              | 2.19% | 7.80 |
| S40-2 | 12.2          | 4656.3          | ND       | 0.6           | 0.04           | 1.5             | ND             | ND              | ND             | ND            | ND              | 0.75% | 8.18 |
| S41-1 | 44.0          | 4302.3          | 0.3      | 0.8           | 0.2            | 7.1             | ND             | ND              | ND             | ND            | ND              | 0.92% | 8.00 |
| S41-2 | 2.6           | 336.9           | 0.1      | 0.2           | 0.1            | 3.5             | ND             | ND              | ND             | ND            | ND              | 0.17% | 8.52 |
| S42-1 | 27.2          | 2110.1          | 39.4     | 0.1           | 0.3            | 1.1             | ND             | ND              | ND             | ND            | ND              | 1.02% | 8.05 |
| S42-2 | 9.1           | ND              | 28.3     | 0.1           | 0.03           | 0.4             | ND             | ND              | ND             | ND            | ND              | 0.81% | 7.99 |

<sup>a</sup>SX-1 means the top lay soil, SX-2 means the sub-layer soil; TOC was determined with

O.I. analytical solids TOC analyzer (O.I. Analytical, USA). A Thermo Orion 3 Star pH Benchtop meter was used to measure the pH value. The detailed procedures about the TOC and pH detection were described somewhere.<sup>3</sup>



**Table S5. Spearman's rank correlation test results.**

|        |                         | TBBPA<br>-BAE | TBBPS-<br>BDBPE | TBBPA  | TBBPA<br>-MAE | TBBPA<br>-MBAE | TBBPA-<br>MDBPE | TOC    |
|--------|-------------------------|---------------|-----------------|--------|---------------|----------------|-----------------|--------|
| TBBPA- | Correlation Coefficient | 0.928         |                 |        |               |                |                 |        |
| BDBPE  | Sig. (2-tailed)         | <0.05         |                 |        |               |                |                 |        |
| TBBPA  | Correlation Coefficient | 0.598         | 0.632           |        |               |                |                 |        |
|        | Sig. (2-tailed)         | <0.05         | <0.05           |        |               |                |                 |        |
| TBBPA  | Correlation Coefficient | 0.620         | 0.690           | 0.800  |               |                |                 |        |
| -MAE   | Sig. (2-tailed)         | <0.05         | <0.05           | <0.05  |               |                |                 |        |
| TBBPA  | Correlation Coefficient | 0.641         | 0.465           | 0.455  | 0.396         |                |                 |        |
| -MBAE  | Sig. (2-tailed)         | <0.05         | <0.05           | <0.05  | <0.05         |                |                 |        |
| TBBPA  | Correlation Coefficient | 0.545         | 0.646           | 0.752  | 0.857         | 0.419          |                 |        |
| -MDBPE | Sig. (2-tailed)         | <0.05         | <0.05           | <0.05  | <0.05         | <0.05          |                 |        |
| TOC    | Correlation Coefficient | 0.291         | 0.373           | 0.325  | 0.277         | 0.069          | 0.355           |        |
|        | Sig. (2-tailed)         | <0.05         | <0.05           | <0.05  | <0.05         | 0.533          | <0.05           |        |
| PH     | Correlation Coefficient | -0.117        | -.205           | -0.284 | -0.186        | 0.017          | -0.280          | -0.494 |
|        | Sig. (2-tailed)         | 0.290         | 0.061           | <0.05  | 0.091         | 0.877          | <0.05           | <0.05  |

**Table S6. Mass chromatography peak area ratios of untargeted TBBPA analogs compared to TBBPA in soil samples.**

|       | TBBPA-MME/TBBPA | TriBBPA-MAE/TBBPA | DBBPA-MAE/TBBPA | TriBBPA/TBBPA | DBBPA/TBBPA |
|-------|-----------------|-------------------|-----------------|---------------|-------------|
| S1-1  | 2.89%           | 0.22%             | ND              | 9.80%         | 0.07%       |
| S1-2  | 0.28%           | ND                | ND              | 0.32%         | ND          |
| S2-1  | 3.70%           | 0.25%             | ND              | 14.00%        | 0.35%       |
| S2-2  | 3.32%           | ND                | ND              | 3.65%         | ND          |
| S3-1  | 3.85%           | ND                | ND              | 2.05%         | ND          |
| S3-2  | 1.23%           | ND                | ND              | 0.53%         | ND          |
| S4-1  | 5.42%           | ND                | ND              | 0.70%         | ND          |
| S4-2  | 0.11%           | ND                | ND              | 0.22%         | ND          |
| S5-1  | 7.64%           | 1.70%             | 0.99%           | 13.92%        | 4.87%       |
| S5-2  | 9.01%           | 3.00%             | 3.03%           | 8.91%         | 5.01%       |
| S6-1  | 11.87%          | ND                | ND              | 1.69%         | 0.09%       |
| S6-2  | 10.65%          | ND                | ND              | 1.89%         | ND          |
| S7-1  | 25.67%          | ND                | ND              | 0.88%         | ND          |
| S7-2  | 9.46%           | ND                | ND              | 3.45%         | ND          |
| S8-1  | 6.32%           | ND                | ND              | 1.17%         | ND          |
| S8-2  | 23.52%          | ND                | ND              | 0.40%         | ND          |
| S9-1  | 10.74%          | ND                | ND              | 0.64%         | ND          |
| S9-2  | 12.02%          | ND                | ND              | 0.26%         | ND          |
| S10-1 | 28.47%          | 0.42%             | 0.003%          | 5.09%         | 0.15%       |
| S10-2 | 4.36%           | ND                | ND              | ND            | ND          |
| S11-1 | 7.82%           | 0.35%             | ND              | 4.39%         | 0.04%       |
| S11-2 | 3.18%           | ND                | ND              | 0.52%         | 0.14%       |
| S12-1 | 16.88%          | 0.47%             | ND              | 4.18%         | 0.06%       |
| S12-2 | 11.18%          | ND                | ND              | 0.61%         | ND          |
| S13-1 | 3.05%           | ND                | 0.02%           | 2.81%         | 0.02%       |
| S13-2 | 0.44%           | ND                | ND              | 2.21%         | ND          |
| S14-1 | 2.40%           | ND                | ND              | 1.96%         | ND          |
| S14-2 | 2.03%           | ND                | ND              | 1.37%         | ND          |
| S15-1 | 6.17%           | ND                | ND              | 2.62%         | ND          |
| S15-2 | 2.63%           | ND                | ND              | 1.13%         | ND          |
| S16-1 | 3.16%           | 2.31%             | 0.09%           | 25.80%        | 0.98%       |
| S16-2 | 9.17%           | 1.12%             | ND              | 5.68%         | 0.14%       |
| S17-1 | 0.80%           | ND                | ND              | 5.02%         | ND          |
| S17-2 | 0.69%           | ND                | ND              | 1.18%         | ND          |
| S18-1 | 0.55%           | ND                | ND              | ND            | ND          |
| S18-2 | 27.42%          | ND                | ND              | ND            | ND          |
| S19-1 | 182.50%         | ND                | ND              | 1.95%         | 0.77%       |
| S19-2 | 13.86%          | ND                | ND              | ND            | ND          |
| S20-1 | 5.19%           | ND                | 0.04%           | 1.98%         | 0.06%       |
| S20-2 | 23.40%          | 1.98%             | 0.22%           | 3.44%         | 0.25%       |
| S21-1 | 29.27%          | ND                | 12.18%          | 5.30%         | 2.74%       |
| S21-2 | 4.62%           | ND                | 1.70%           | 0.10%         | ND          |
| S22-1 | 85.09%          | 3.46%             | 1.11%           | 2.12%         | 0.29%       |
| S22-2 | 21.70%          | 1.68%             | 0.69%           | 3.16%         | 0.17%       |

Continued

|       | TBBPA-MME/TBBPA | TriBBPA-MAE/TBBPA | DBBPA-MAE/TBBPA | TriBBPA/TBBPA | DBBPA/TBBPA |
|-------|-----------------|-------------------|-----------------|---------------|-------------|
| S23-1 | 12.06%          | ND                | ND              | 2.17%         | 0.15%       |
| S23-2 | 2.37%           | ND                | ND              | 0.29%         | ND          |
| S24-1 | 12.51%          | 1.10%             | 0.08%           | 7.07%         | 0.35%       |
| S24-2 | 32.49%          | 8.98%             | 0.60%           | 6.12%         | 1.08%       |
| S25-1 | 4.78%           | 1.56%             | 0.29%           | 12.20%        | 0.27%       |
| S25-2 | 0.80%           | 0.23%             | 0.05%           | 3.83%         | 0.06%       |
| S26-1 | 2.63%           | ND                | ND              | 1.68%         | 0.02%       |
| S26-2 | 1.83%           | 0.01%             | 0.00%           | 4.31%         | 0.09%       |
| S27-1 | 24.59%          | ND                | ND              | 2.59%         | 0.16%       |
| S27-2 | 3.41%           | ND                | ND              | 0.65%         | 0.01%       |
| S28-1 | 17.37%          | 1.12%             | ND              | 3.55%         | 0.15%       |
| S28-2 | 1.46%           | 0.14%             | ND              | 3.34%         | 0.00%       |
| S29-1 | 7.44%           | 1.41%             | 0.02%           | 6.60%         | 0.31%       |
| S29-2 | 1.89%           | ND                | ND              | 4.10%         | 0.08%       |
| S30-1 | 8.43%           | 0.57%             | 0.04%           | 4.75%         | 0.60%       |
| S30-2 | 4.50%           | 0.66%             | ND              | 3.70%         | 0.10%       |
| S31-1 | 20.32%          | ND                | ND              | 0.58%         | ND          |
| S31-2 | 11.68%          | ND                | ND              | 3.69%         | 4.67%       |
| S32-1 | 0.47%           | ND                | ND              | 0.58%         | ND          |
| S32-2 | 1.43%           | ND                | ND              | ND            | ND          |
| S33-1 | 18.47%          | ND                | ND              | 4.58%         | 0.11%       |
| S33-2 | 12.43%          | ND                | ND              | 2.51%         | ND          |
| S34-1 | 4.50%           | 0.58%             | ND              | 7.20%         | 0.32%       |
| S34-2 | 6.25%           | ND                | ND              | 4.93%         | 0.05%       |
| S35-1 | 1.18%           | ND                | ND              | ND            | ND          |
| S35-2 | 23.71%          | ND                | ND              | 0.82%         | ND          |
| S36-1 | 12.69%          | 2.92%             | ND              | 3.36%         | 0.34%       |
| S36-2 | 16.71%          | 3.87%             | ND              | 3.15%         | ND          |
| S37-1 | 3.32%           | 0.74%             | 0.19%           | 5.87%         | 0.12%       |
| S37-2 | 15.62%          | ND                | ND              | 1.26%         | 0.06%       |
| S38-1 | 7.34%           | ND                | ND              | 1.27%         | ND          |
| S38-2 | 4.55%           | ND                | ND              | 5.04%         | ND          |
| S39-1 | 20.18%          | ND                | ND              | 1.54%         | ND          |
| S39-2 | 6.04%           | ND                | ND              | 1.18%         | ND          |
| S40-1 | ND              | ND                | ND              | ND            | ND          |
| S40-2 | 1.84%           | ND                | ND              | 0.43%         | 0.01%       |
| S41-1 | 31.23%          | ND                | ND              | ND            | ND          |
| S41-2 | 10.94%          | ND                | ND              | 0.61%         | ND          |
| S42-1 | 4.24%           | ND                | ND              | ND            | ND          |
| S42-2 | 0.77%           | ND                | ND              | 0.31%         | ND          |

**Table S7.** Calculated physical-chemical constants<sup>a</sup> of TBBPA, TBBPA derivatives and potential transformation products.

|              | WS <sup>b</sup> | log $K_{ow}$ <sup>c</sup> | log $K_{aw}$ <sup>d</sup> | log $K_{oa}$ <sup>e</sup> | log $K_{oc}$ <sup>f</sup> | BCF <sup>g</sup> |
|--------------|-----------------|---------------------------|---------------------------|---------------------------|---------------------------|------------------|
| TBBPA-BDBPE  | 1.2E-10         | 11.5                      | -8.8                      | 20.3                      | 7.4                       | 81               |
| TBBPA-BAE    | 3.1E-07         | 10.0                      | -5.3                      | 15.3                      | 6.6                       | 442              |
| TBBPA-BHEE   | 1.6E-04         | 6.8                       | -11.1                     | 17.9                      | 4.0                       | 7720             |
| TBBPA-BGE    | 3.3E-05         | 7.4                       | -10.3                     | 17.7                      | 5.0                       | 8428             |
| TBBPA-MDBPE  | 6.9E-07         | 9.4                       | -9.9                      | 19.3                      | 6.3                       | 928              |
| TBBPA-MBAE   | 4.8E-06         | 9.0                       | -8.9                      | 17.9                      | 6.1                       | 1388             |
| TBBPA-MAE    | 3.5E-05         | 8.6                       | -8.2                      | 16.8                      | 5.9                       | 2163             |
| TBBPA--MGE   | 3.5E-04         | 7.3                       | -10.9                     | 18.2                      | 5.1                       | 9440             |
| TBBPA-MHEE   | 3.8E-03         | 6.8                       | -12.6                     | 19.4                      | 4.5                       | 7793             |
| TBBPA-MHPE   | 1.2E-03         | 7.3                       | -12.5                     | 19.7                      | 5.0                       | 5380             |
| TBBPA-MDHPE  | 1.2E-03         | 6.6                       | -13.9                     | 20.4                      | 3.9                       | 5405             |
| TBBPA-MBHPE  | 2.1E-04         | 7.6                       | -13.4                     | 21.0                      | 5.1                       | 3964             |
| TriBBPA-MAE  | 6.5E-04         | 7.7                       | -7.8                      | 15.5                      | 5.4                       | 5905             |
| HTriBBPA-MAE | 1.3E-03         | 7.2                       | -11.7                     | 19.0                      | 5.3                       | 10150            |
| DBBPA-MAE    | 1.2E-02         | 6.8                       | -7.4                      | 14.2                      | 4.9                       | 14910            |
| TBBPA        | 1.0E-03         | 7.2                       | -11.0                     | 18.2                      | 5.2                       | 10580            |
| TriBBPA      | 1.9E-02         | 6.3                       | -10.6                     | 16.9                      | 4.7                       | 6797             |
| DBBPA        | 0.3             | 5.4                       | -10.2                     | 15.6                      | 4.3                       | 1758             |
| MBBPA        | 5.7             | 4.5                       | -9.8                      | 14.4                      | 3.8                       | 455              |
| BPA          | 172.7           | 3.6                       | -9.1                      | 12.8                      | 3.1                       | 72               |

<sup>a</sup>Calculated by US EPA Suite V 4.1;

<sup>b</sup>Water solubility, (mg/L);

<sup>c</sup>octanol-water partition coefficient;

<sup>d</sup>air-water partition coefficient;

<sup>e</sup>octanol-air partition coefficient;

<sup>f</sup>soil absorption coefficient;

<sup>g</sup>bioconcentration factor (L/kg, wet-wt).

---

## References

- (1) Gallart-Ayala, H.; Moyano, E.; Galceran, M. T., Liquid chromatography/multi-stage mass spectrometry of bisphenol A and its halogenated derivatives. *Rapid Commun. Mass Spectrom.* **2007**, *21*, (24), 4039-4048.
- (2) Saint-Louis, R.; Pelletier, E., LC-ESI-MS-MS method for the analysis of tetrabromobisphenol A in sediment and sewage sludge. *Analyst* **2004**, *129*, (8), 724-730.
- (3) Gao, Y.; Fu, J. J.; Zeng, L. X.; Li, A.; Li, H. J.; Zhu, N. L.; Liu, R. Z.; Liu, A. F.; Wang, Y. W.; Jiang, G. B., Occurrence and fate of perfluoroalkyl substances in marine sediments from the Chinese Bohai Sea, Yellow Sea, and East China Sea. *Environ. Pollut.* **2014**, *194*, 60-68.
